# Supplementary material for: A novel metalporphyrin-based microporous organic polymer with high CO2 uptake and efficient chemical conversion of CO2 under ambient conditions
Source: Royal Society of Chemistry journal article supplement (doi:10.1039/c6ta08556c), 2016-12-05
Supplement: c6ta08556c1.pdf [file c6ta08556c1.pdf]

## Supporting information

### **Novel Metalporphyrin-based Microporous Organic Polymer with High CO<sub>2</sub> Uptake and Efficient Chemical Conversion of CO<sub>2</sub> under Ambient Conditions**

Shaolei Wang,<sup>a†</sup> Kunpeng Song,<sup>a†</sup> Chengxin Zhang,<sup>a</sup> Yu Shu,<sup>a</sup> Tao Li<sup>a,b\*</sup> and Bien Tan<sup>a,b\*</sup>

†Shaolei Wang and Kunpeng Song contributed equally to this work.

<sup>a</sup> School of Chemistry and Chemical Engineering, Huazhong University of Science and Technology, Wuhan, 430074, China. E-mail: [bien.tan@mail.hust.edu.cn](mailto:bien.tan@mail.hust.edu.cn); [taoli@mail.hust.edu.cn](mailto:taoli@mail.hust.edu.cn). fax: +862787543632; Tel: +862787558172.

<sup>b</sup> Key Laboratory for Large-Format Battery Materials and System, Ministry of Education, School of Chemistry and Chemical Engineering, Huazhong University of Science and Technology, Luoyu Road No. 1037, Wuhan, 430074, China.

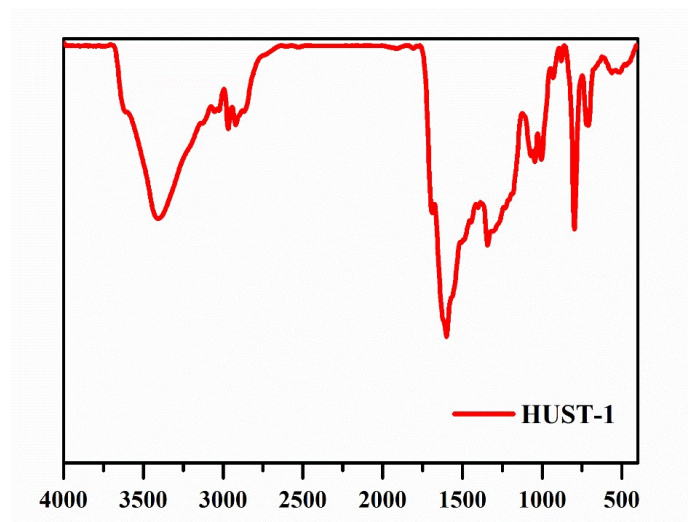

**Figure S1.** Fourier transform infrared (FT-IR) spectrum of HUST-1.

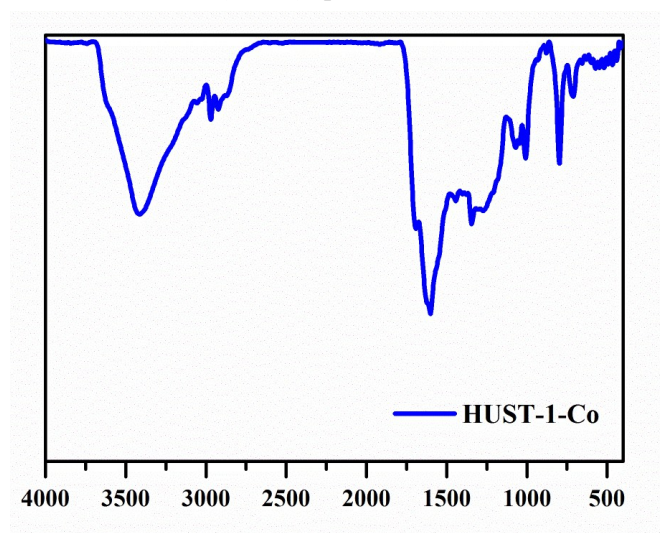

**Figure S2.** Fourier transform infrared (FT-IR) spectrum of HUST-1-Co.

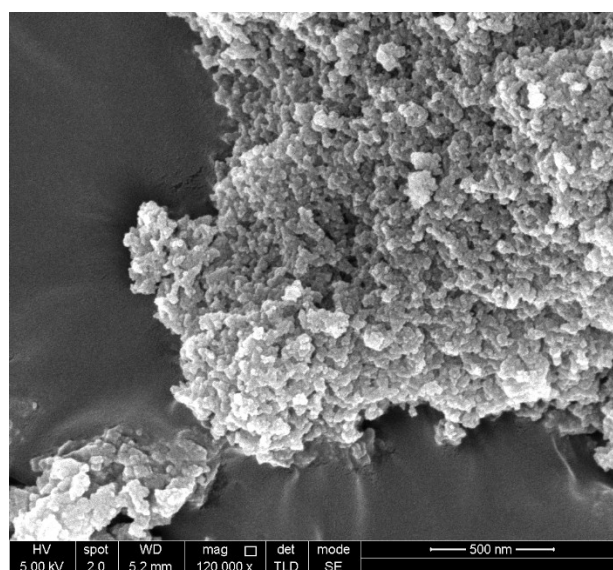

(a)

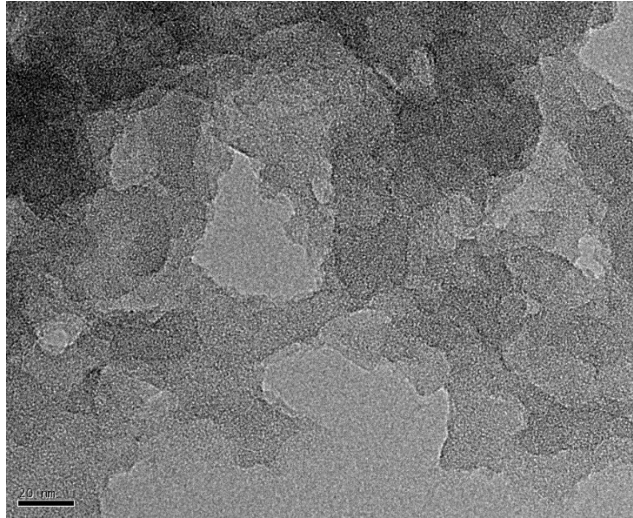

(b)

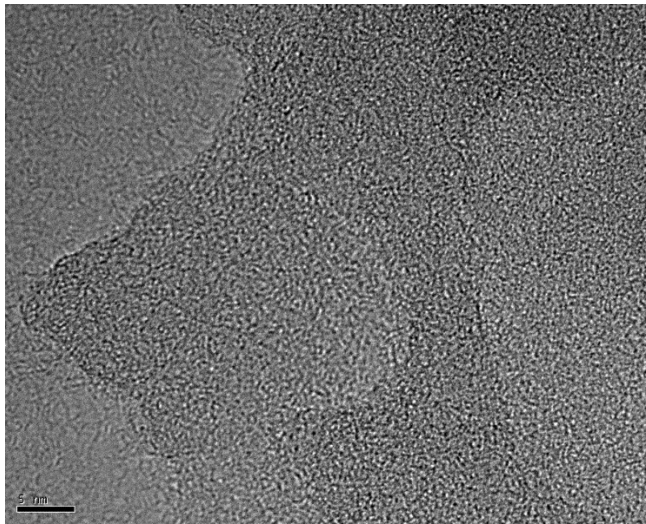

(c)

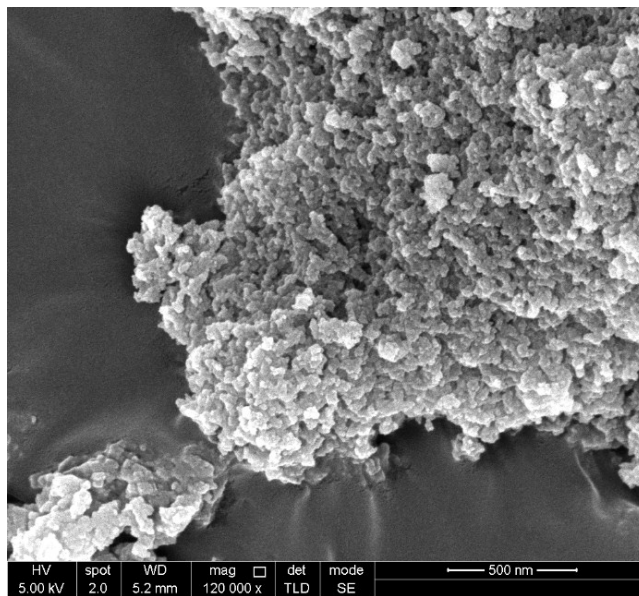

(d)

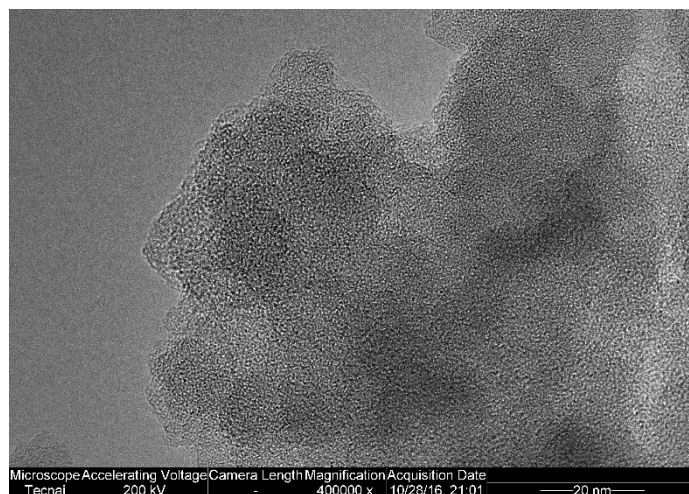

(e)

**Figure S3.** FE-SEM image (a), HR-TEM images (b) and (c) of HUST-1; FE-SEM image (d) and HR-TEM image (e) of HUST-1-Co.

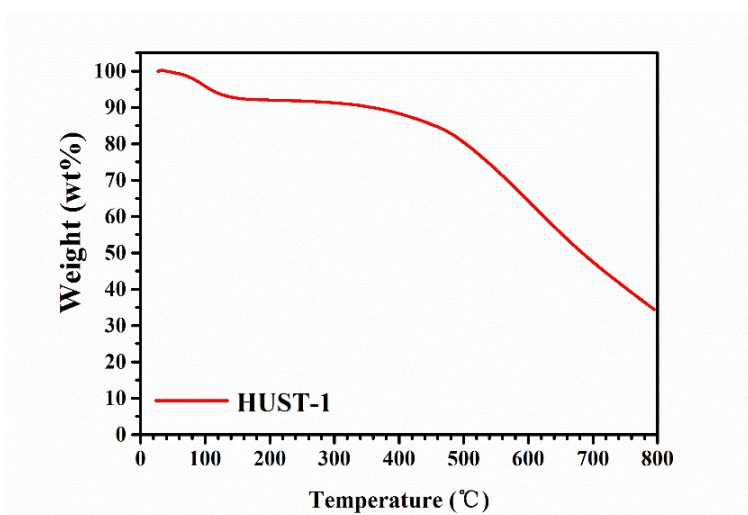

**Figure S4.** TGA of HUST-1 with a heating rate of  $10\text{ }^{\circ}\text{C min}^{-1}$ .

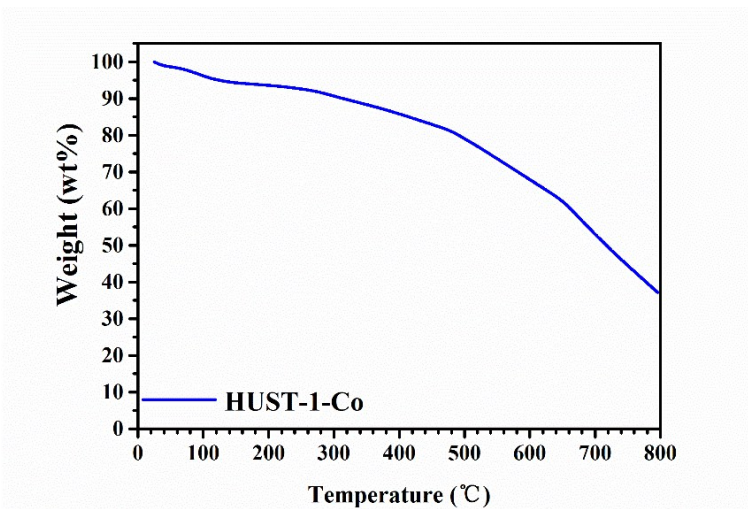

**Figure S5.** TGA of HUST-1-Co with a heating rate of  $10\text{ }^{\circ}\text{C min}^{-1}$ .



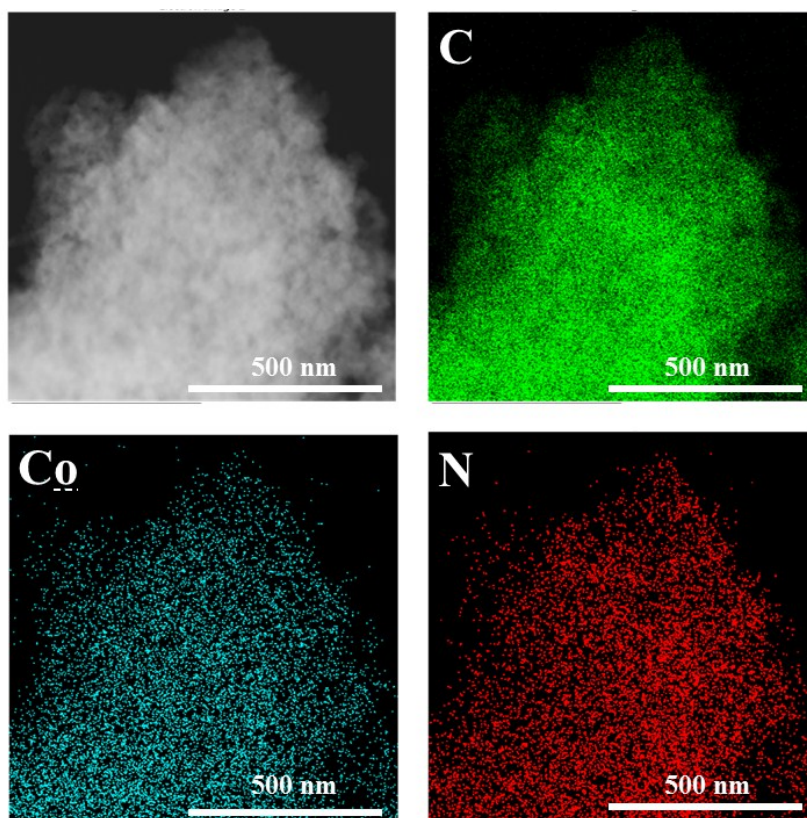

**Figure S6.** Electron image and element mapping (C, Co, and N) spectra for HUST-1-Co.

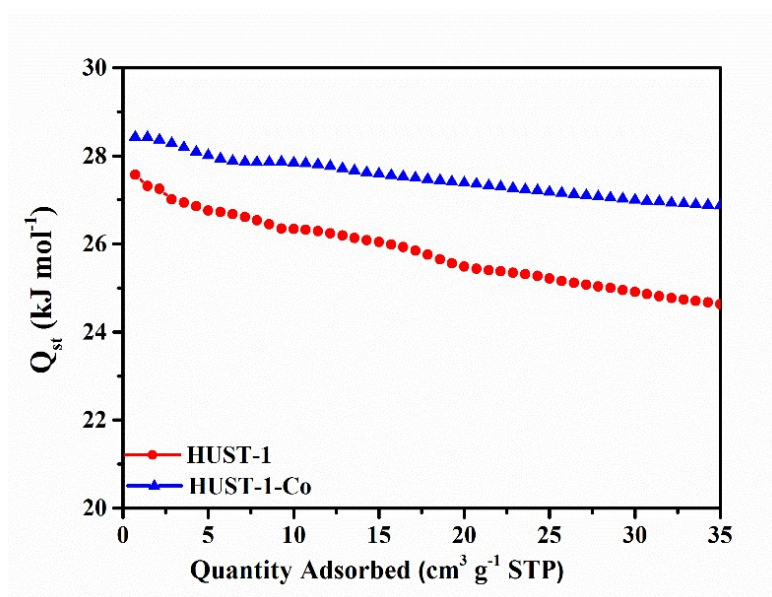

**Figure S7.** adsorption different

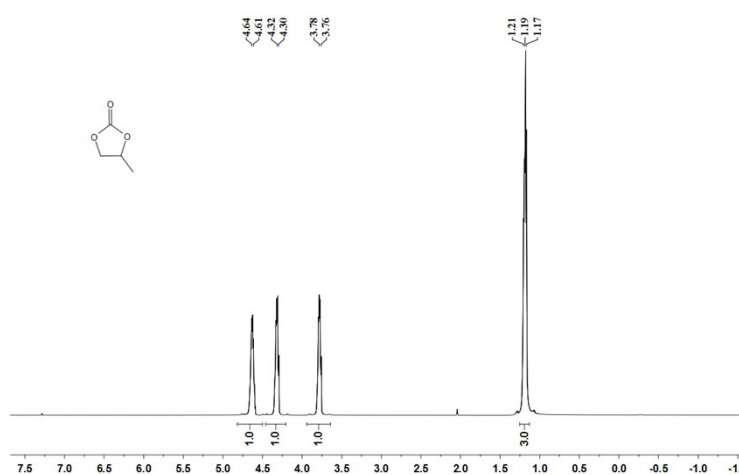

Isosteric heat of adsorption for CO<sub>2</sub> at different CO<sub>2</sub> loadings.

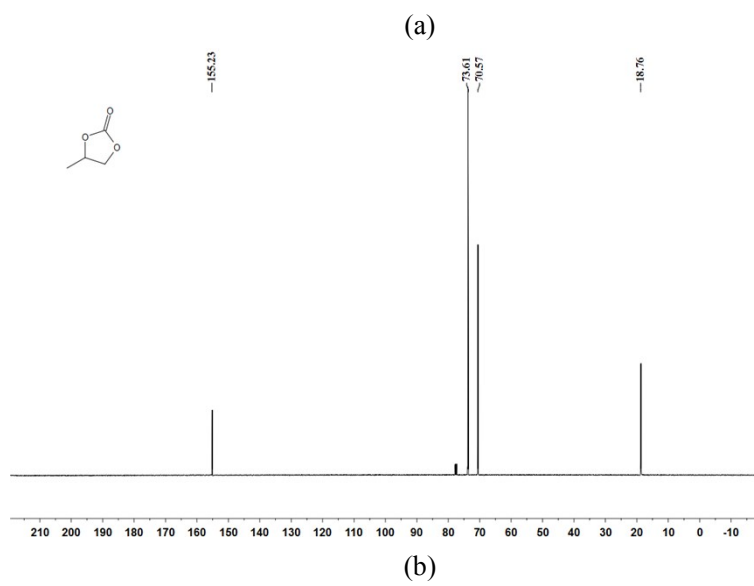

**Figure S8.**  $^1\text{H}$  (a) and  $^{13}\text{C}$  (b) NMR images of 4-methyl-1,3-dioxolan-2-one.

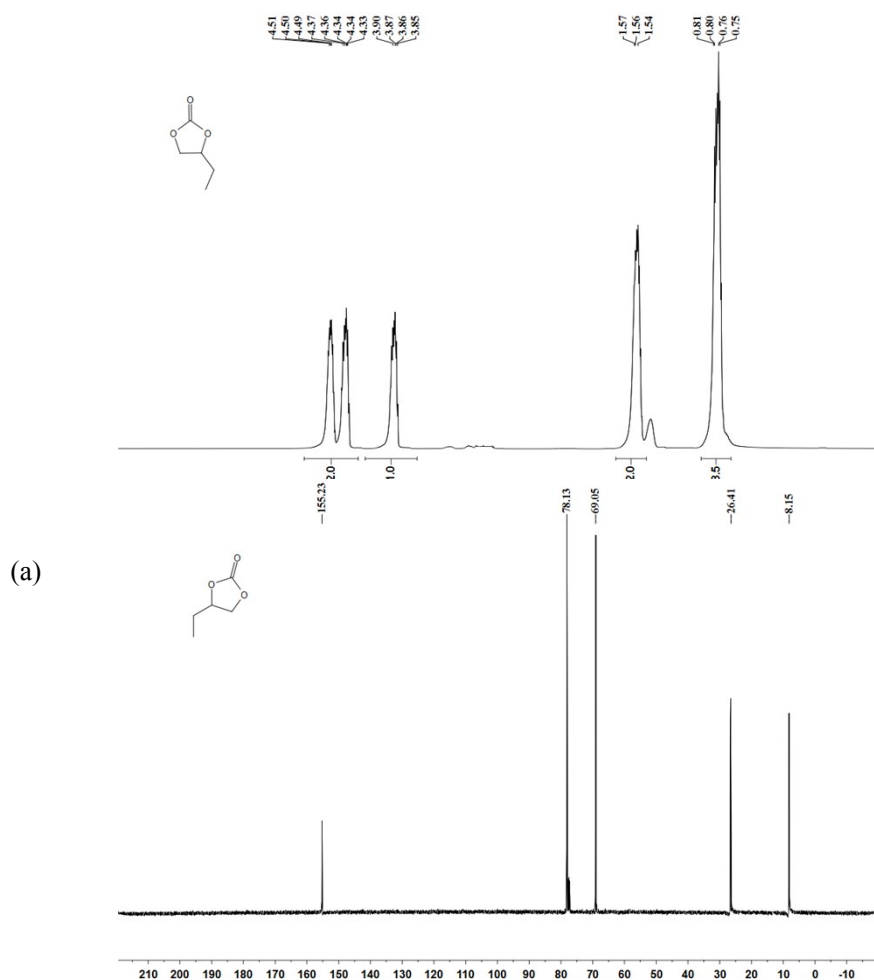

(b)  
**Figure S9.**  $^1\text{H}$  (a) and  $^{13}\text{C}$  (b) NMR images of 4-ethyl-1,3-dioxolan-2-one.

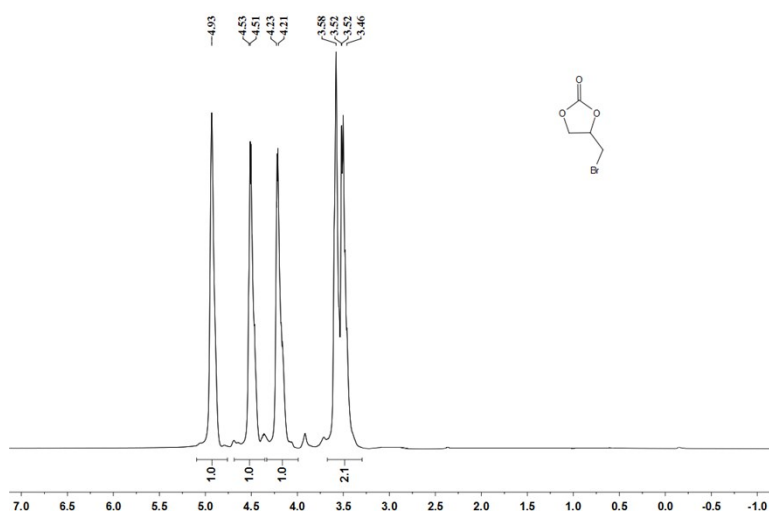

(a)

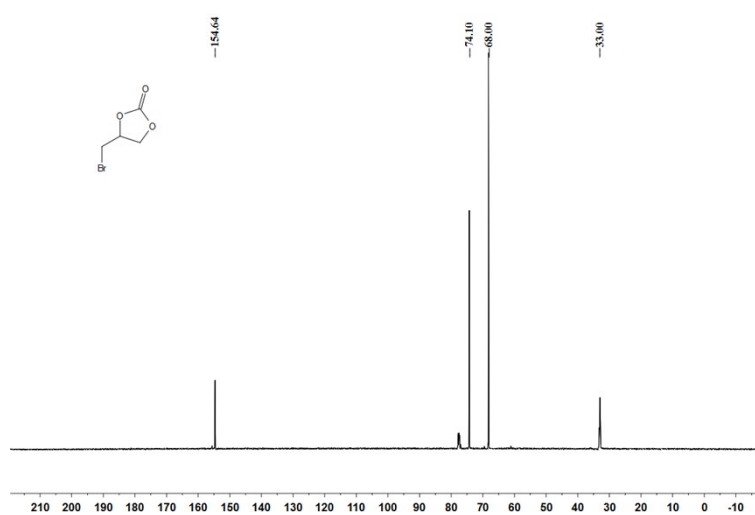

(b)

**Figure S10.**  $^1\text{H}$  (a) and  $^{13}\text{C}$  (b) NMR images of 4-(bromomethyl)-1,3-dioxolan-2-one.

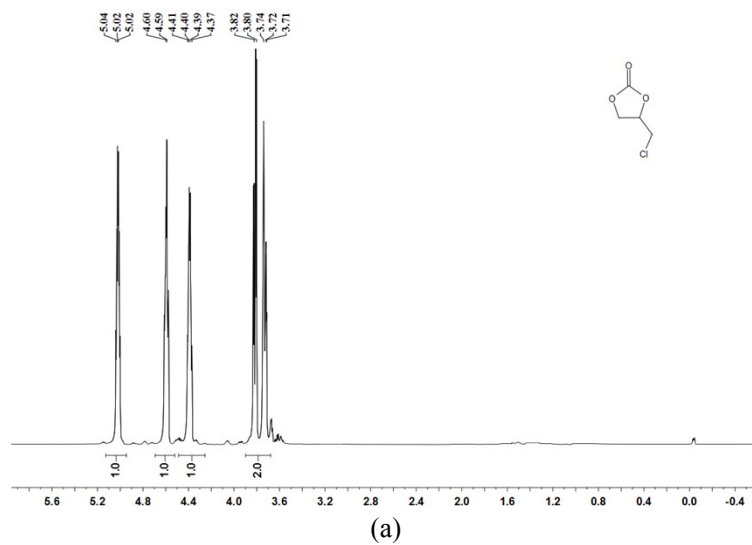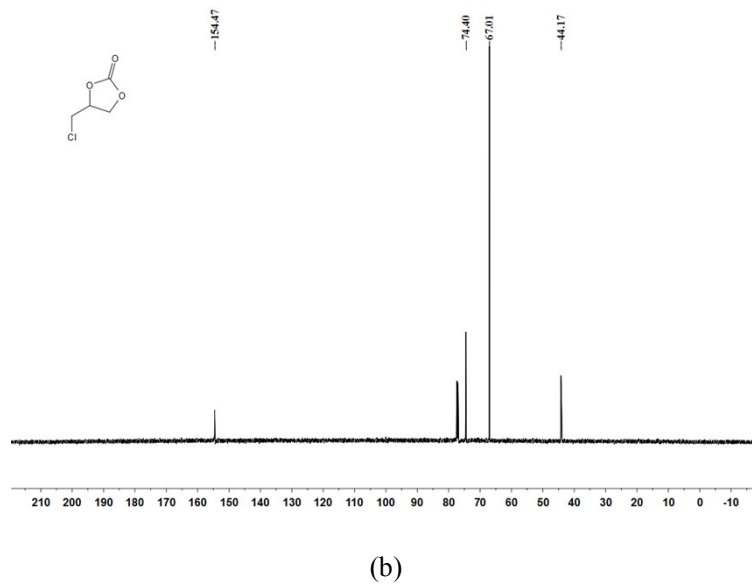

**Figure S11.**  $^1\text{H}$  (a) and  $^{13}\text{C}$  (b) NMR images of 4-(chloromethyl)-1,3-dioxolan-2-one.

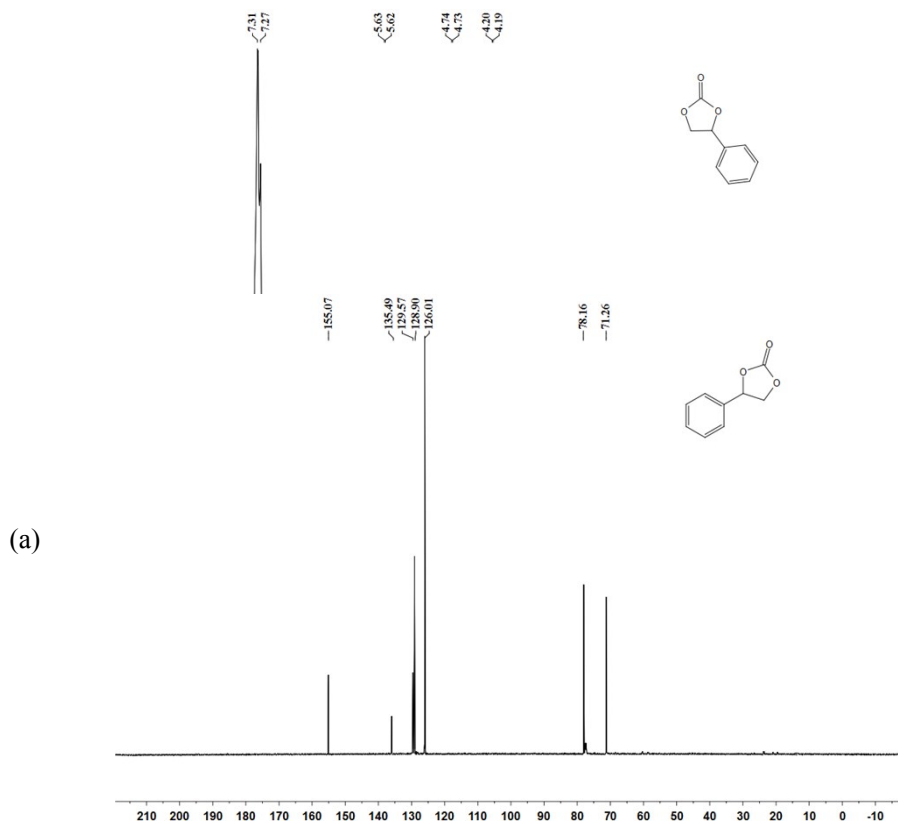



(b)

**Figure S12.**  $^1\text{H}$  (a) and  $^{13}\text{C}$  (b) NMR images of 4-phenyl-1,3-dioxolan-2-one.

**Table S1** The catalytic performance for chemical conversion of  $\text{CO}_2$  into cyclic carbonates catalyzed by different metals ( $\text{Co}^{2+}$ ,  $\text{Zn}^{2+}$  and  $\text{Al}^{3+}$ ) catalytic system<sup>a</sup>.

| Entry     | TBAB (mmol) | Catalyst (mg) | P (MPa) | Time (h) | Yield (%) |
|-----------|-------------|---------------|---------|----------|-----------|
| HUST-1-Co | 1.8         | 10            | 0.1     | 24       | 54.3      |
| HUST-1-Zn | 1.8         | 10            | 0.1     | 24       | 16.7      |
| HUST-1-Al | 1.8         | 10            | 0.1     | 24       | 10.2      |

<sup>a</sup> Typical reaction conditions of exploration stage: 25 mmol PO with 10 mg catalysts, theory of metal content is 1.0 wt%, room temperature, 1 atm  $\text{CO}_2$  pressure and reaction time is 24 h.

**Table S2** The catalytic performance for chemical conversion of  $\text{CO}_2$  into cyclic carbonates catalyzed by various catalytic systems.

| Catalyst                 | T ( $^{\circ}\text{C}$ ) | P (MPa) | Time (h) | Yield (%) | TON (TOF)  | Ref.      |
|--------------------------|--------------------------|---------|----------|-----------|------------|-----------|
| HUST-1-Co <sup>a</sup>   | 25                       | 0.1     | 48       | 94.6      | 3101 (64)  | This work |
| MMCF-2 <sup>a</sup>      | 25                       | 0.1     | 48       | 95.4      | 763 (16)   | S1        |
| MOF 1 <sup>a</sup>       | 25                       | 0.1     | 48       | 96        | 383 (8)    | S2        |
| Co-CMP <sup>a</sup>      | 25                       | 0.1     | 48       | 81.5      | 167 (3)    | S3        |
| Cr-CMP <sup>a</sup>      | 25                       | 0.1     | 48       | 67.7      | 150 (3)    | S4        |
| Co/CMP-TPP <sup>a</sup>  | 29                       | 0.1     | 24       | 95.8      | 441 (18)   | S5        |
| Co-MON <sup>a</sup>      | 60                       | 1       | 12       | 94        | 1860 (155) | S6        |
| Salen-Co <sup>a</sup>    | 25                       | 0.1     | 48       | 75.8      | 155 (3)    | S7        |
| PCN-224(Co) <sup>a</sup> | 100                      | 2       | 4        | 42        | 461 (115)  | S8        |

<sup>a</sup> propylene oxide as epoxide substrates.

### The yield of polymers calculations.

$$w = \frac{(m_{\text{polymers}})}{(m_{\text{monomers}})} * 100\%$$

where  $m_{\text{polymers}}$  is the weight of the dry polymers obtained by solvent knitting hyper-crosslinked microporous polymers method,  $m_{\text{monomers}}$  is the weight of the corresponding monomers of polymers.

### References

- S1. W.-Y. Gao, Y. Chen, Y. Niu, K. Williams, L. Cash, P. J. Perez, L. Wojtas, J. Cai, Y.-S. Chen and S. Ma, *Angew. Chem. Int. Ed.*, 2014, **53**, 2615-2619.
- S2. P.-Z. Li, X.-J. Wang, J. Liu, J. S. Lim, R. Zou and Y. Zhao, *J. Am. Chem. Soc.*, 2016, **138**, 2142-2145.
- S3. Y. Xie, T. T. Wang, X. H. Liu, K. Zou and W. Q. Deng, *Nat. Commun.*, 2013, **4**, 7.
- S4. Y. Xie, R. X. Yang, N. Y. Huang, H. J. Luo and W. Q. Deng, *Journal of Energy Chemistry*, 2014, **23**, 22-28.
- S5. Z. Dai, Q. Sun, X. Liu, C. Bian, Q. Wu, S. Pan, L. Wang, X. Meng, F. Deng and F.-S. Xiao, *J. Catal.*, 2016, **338**, 202-209.
- S6. J. Chun, S. Kang, N. Kang, S. M. Lee, H. J. Kim and S. U. Son, *J. Mater. Chem. A*, 2013, **1**, 5517-5523.
- S7. T. T. Wang, Y. Xie and W. Q. Deng, *J. Phys. Chem. A*, 2014, **118**, 9239-9243.
- S8. D. Feng, W.-C. Chung, Z. Wei, Z.-Y. Gu, H.-L. Jiang, Y.-P. Chen, D. J. Darensbourg and H.-C. Zhou, *J. Am. Chem. Soc.*, 2013, **135**, 17105-17110.
